# Supplementary material for: Qualitative Evidence Synthesis (QES) for Guidelines: Paper 1 – Using qualitative evidence synthesis to inform guideline scope and develop qualitative findings statements
Source: Springer Nature journal article supplement (doi:10.1186/s12961-019-0467-5), 2019-08-07
Supplement: MOESM1 [file 17047122]

## PRISMA Flow Diagram – What matters to women during childbirth.

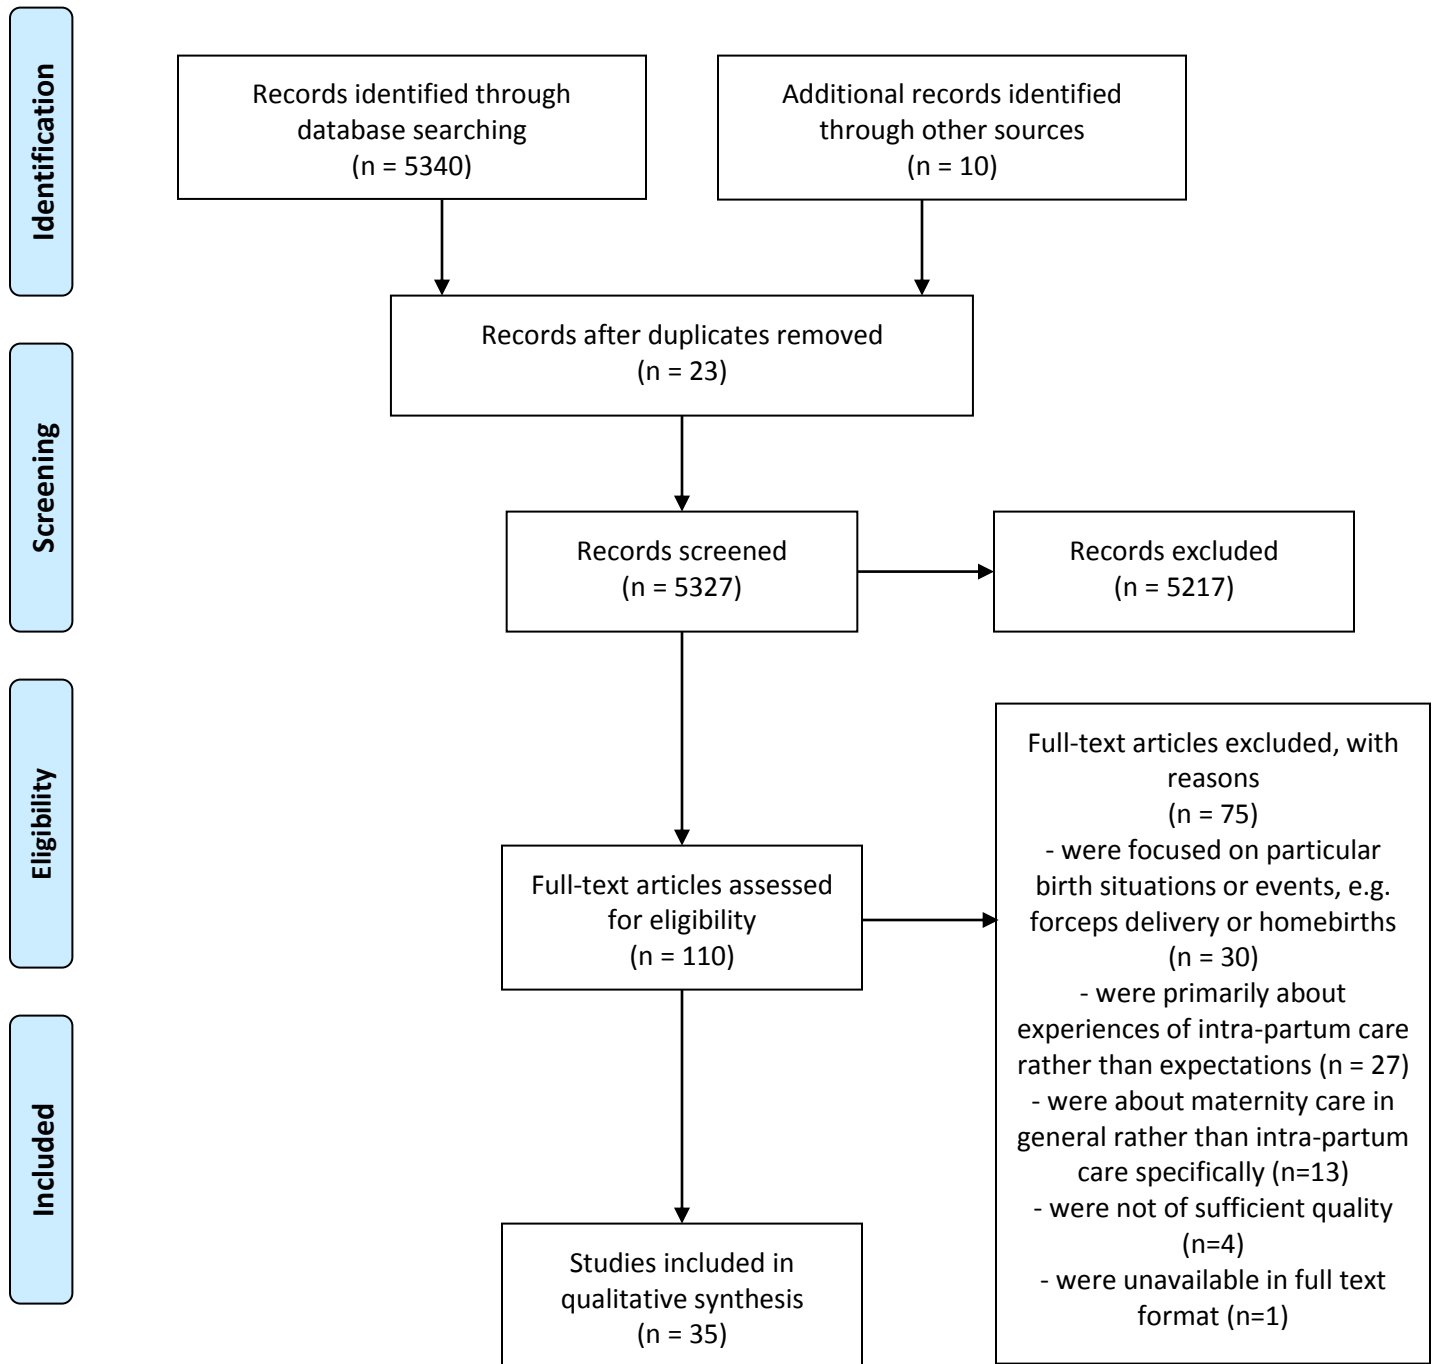

From: Moher D, Liberati A, Tetzlaff J, Altman DG, The PRISMA Group (2009). Preferred Reporting Items for Systematic Reviews and Meta-Analyses: The PRISMA Statement. PLoS Med 6(6): e1000097. doi:10.1371/journal.pmed1000097

For more information, visit [www.prisma-statement.org](http://www.prisma-statement.org).
